# Supplementary material for: Structure-based computational screening and molecular dynamics reveal potential inhibitors of Norovirus VP1 and RdRp Proteins: an in-silico study
Source: Research Square preprint supplement (doi:10.21203/rs.3.rs-8463011/v1), 2026-01-05
Supplement: Supplementary file 1 [file 8ed743a047022e9f60ce79f4.docx]

**Structure-based computational screening and molecular dynamics reveal potential inhibitors of norovirus VP1 and RdRp proteins: an in-silico study**

Hasan Huzayfa Rahaman1#, Nadim Sharif 1*#, Al Imran Kafi1, Wasifuddin Ahmed2, Nazmul Sharif3, Fuad M. Alzahrani8, Khalaf F. Alsharif8, Khalid J. Alzahrani8, Shuvra Kanti Dey1*

**Supplementary Figure i.** Predicted proteins structures and their stability by the ERRAT2 and ProSA: A. The predicted structures and ERRAT overall quality scores, B. The Z-scores, C. The plot of residue scores, and D. The Ramachandran plot for RNA-dependent RNA-polymerase.

**
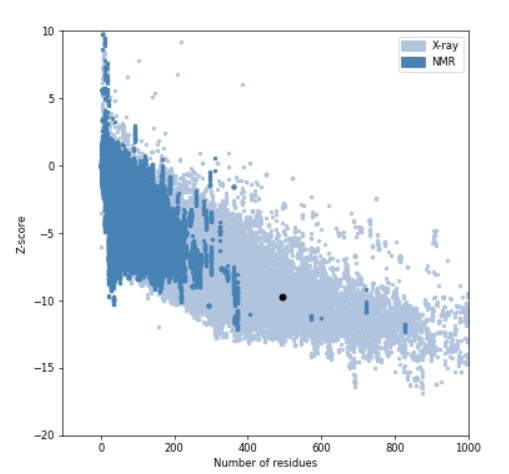
**
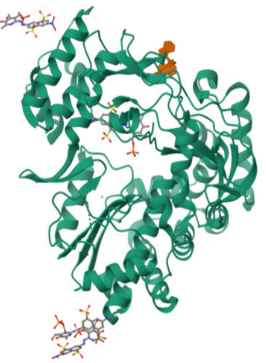


B

A

ERRAT Overall Quality Factor 95.16; Z-score -9.69


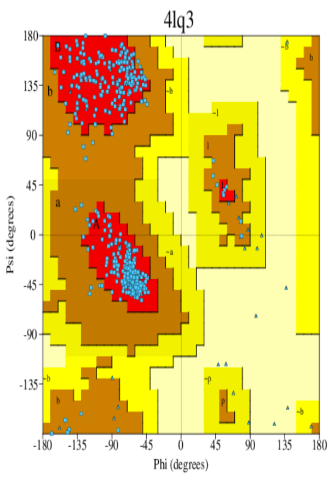

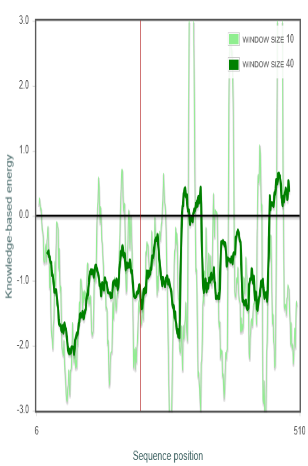


C

D

**Supplementary Figure ii.** Predicted proteins structures and their stability by the ERRAT2 and ProSA: A. The predicted structures and ERRAT overall quality scores, B. The Z -scores, C. The plot of residue scores, and D. The Ramachandran plot for VP1.


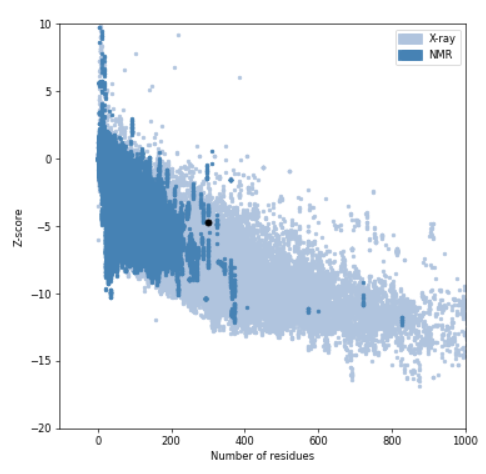

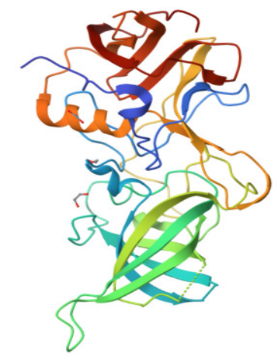


B

A

ERRAT Overall Quality Factor 95.27; Z-score -4.69

C


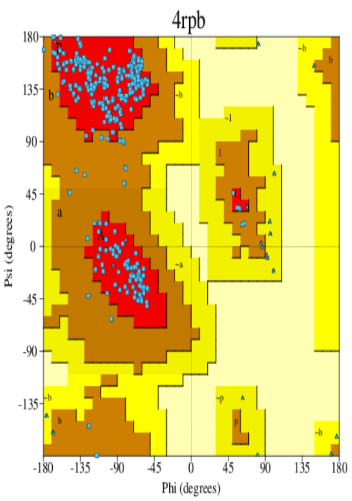

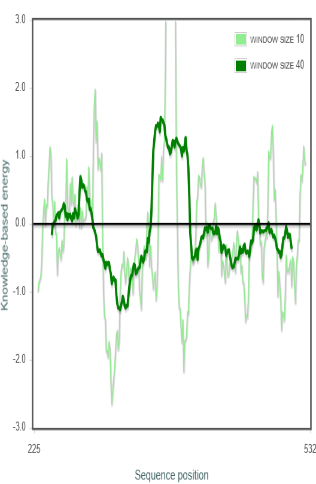


D

**Supplementary Figure iii.** Showing theSolvent Accessible Surface Analysis (SASA)of both proteins: A. RdRp and B. VP1.

**
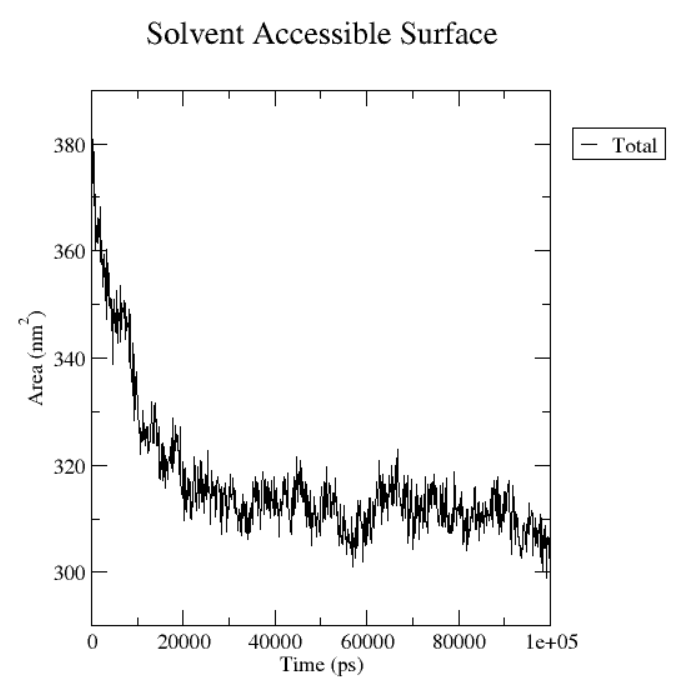

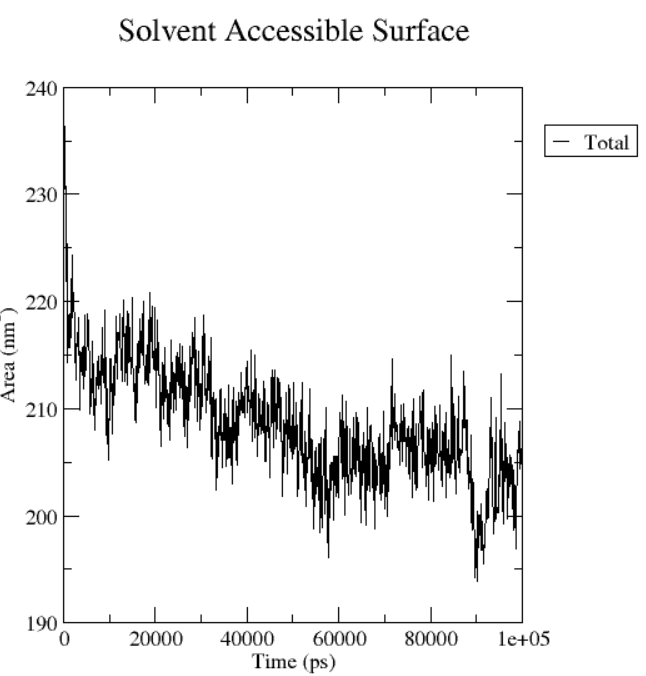
**

A

B

**Supplementary Table 1:** Two-dimensional Structure of the best 59 ligands and control with their binding affinity, compound id and compounds name.

| Plant | Compound | Pubchem ID | Structure | Binding energy |
| --- | --- | --- | --- | --- |
| Ada | Zingiberene | 92776 | 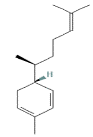 | (4lq3)  -5.7 |
| (4rpb)  -7.2 |
| Zingiberol | 5317270 | 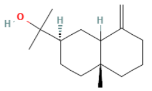 | (4lq3)  -8.7 |
| (4rpb)  -8.9 |
| Gingerols | 442793 | 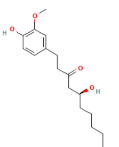 | (4lq3)  -5.7 |
| (4rpb)  -6.6 |
| Shogaols, | 5281794 | 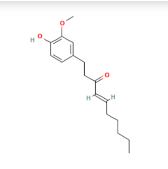 | (4lq3)  -5.5 |
| (4rpb)  -6.3 |
| Terpenoids | 21601966 | 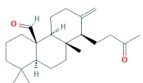 | (4lq3)  -7.8 |
| (4rpb)  -7.3 |
| Akand | Cardenolide | 53957771 | 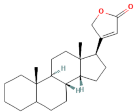 | (4lq3)  -8.7 |
| (4rpb)  -8.6 |
| Flavonoids | 11349 | 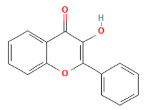 | (4lq3)  -7.3 |
| (4rpb)  -7.3 |
| Aparajita | anthraquinone, | 6780 | 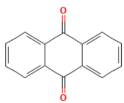 | (4lq3)  -6.9 |
| (4rpb)  -6.8 |
| Basak | Vasicine | 667496 | 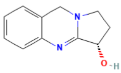 | (4lq3)  -6.2 |
| (4rpb)  -6.7 |
| l-vasicinone | 442935 | 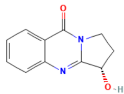 | (4lq3)  -7 |
| (4rpb)  -6.7 |
| Deoxyvasicine | 442894 | 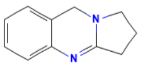 | (4lq3)  -5.9 |
| (4rpb)  -5.9 |
| Barun | Mannitol | 6251 | 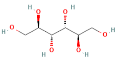 | (4lq3)  -5.1 |
| (4rpb)  -4.9 |
| Bel | Marmelide | 10212 | 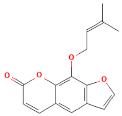 | (4lq3)  -7.2 |
| (4rpb)  -7 |
| Bherenda | Ricinine | 10666 | 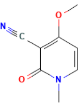 | (4lq3)  -5.1 |
| (4rpb)  -4.9 |
| Bhui kumra | Daidzein | 5281708 | 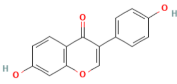 | (4lq3)  -7 |
| (4rpb)  -7.6 |
| Irisolidone | 5281781 | 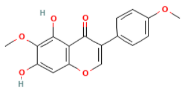 | (4lq3)  -7.1 |
| (4rpb)  -7.8 |
| Dhutra | Atropine | 174174 | 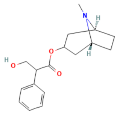 | (4lq3)  -6.6 |
| (4rpb)  -6.7 |
| Gamar | Apigenin | 5280443 | 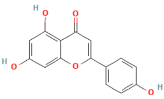 | (4lq3)  -7.4 |
| (4rpb)  -7.5 |
| Halud | Curcumadiol | 5316212 | 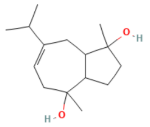 | (4lq3)  -6.3 |
| (4rpb)  -6.6 |
| Phellandrene, | 7460 | 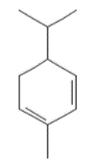 | (4lq3)  -5 |
| (4rpb)  -5.6 |
| Terpinolene | 11463 | 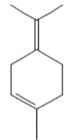 | (4lq3)  -5.3 |
| (4rpb)  -5.5 |
| Haritaki | Pyrogallol | 1057 | 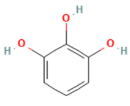 | (4lq3)  -5.4 |
| (4rpb)  -5.9 |
| Katphal | Furfurals | 7362 | 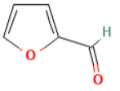 | (4lq3)  -4.1 |
| (4rpb)  -4.1 |
| Khayer | Quercetin | 5280343 | 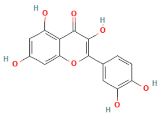 | (4lq3)  -7.7 |
| (4rpb)  -8.4 |
| Fisetin | 5281614 | 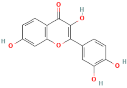 | (4lq3)  -7.8 |
| (4rpb)  -8.3 |
| Khude  dhekishak | Coumarins | 54678486 | 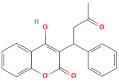 | (4lq3)  -7.6 |
| (4rpb)  -7.4 |
| Quinones | 4650 | 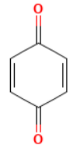 | (4lq3)  -5 |
| (4rpb)  -4.8 |
| Kusum fool | Carthamidin | 188308 | 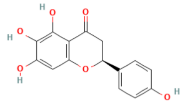 | (4lq3)  -7.4 |
| (4rpb)  -7.9 |
| Lajjabati | Phenolics | 996 | 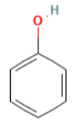 | (4lq3)  -4.8 |
| (4rpb)  -4.9 |
| Methi | isoleucine | 6306 | 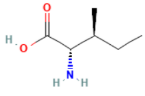 | (4lq3)  -4.5 |
| (4rpb)  -4.9 |
| Morog fool | Sterols | 1107 | 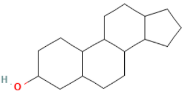 | (4lq3)  -7.3 |
| (4rpb)  -7.5 |
| Mutha | Kaempferol | 5280863 | 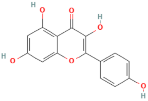 | (4lq3)  -7.3 |
| (4rpb)  -7.7 |
| Luteolin | 5280445 | 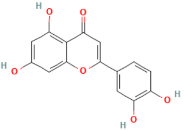 | (4lq3)  -7.5 |
| (4rpb)  -7.9 |
| Nishinda | Stilbene | 638088 | 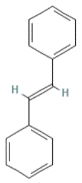 | (4lq3)  -7.2 |
| (4rpb)  -6.7 |
| Patte madar | Caffeic acid | 689043 | 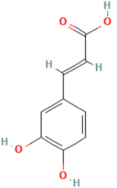 | (4lq3)  -5.6 |
| (4rpb)  -6.6 |
| Pipul | Piperine | 638024 | 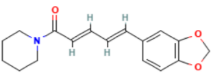 | (4lq3)  -7.2 |
| (4rpb)  -7 |
|  | Volatile oils | 5971 | 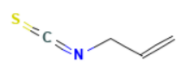 | (4lq3)  -3.4 |
| (4rpb)  -3.1 |
|  | Amides | 2850046 | 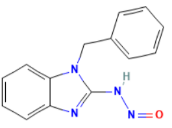 | (4lq3)  -7.4 |
| (4rpb)  -7.5 |
| Punarnava | Boeravinone B | 14018348 | 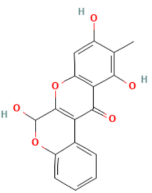 | (4lq3)  -8.1 |
| (4rpb)  -8.7 |
|  | Dimethylflavone | 70446911 | 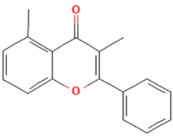 | (4lq3)  -7.5 |
| (4rpb)  -7.7 |
| Randhuni | Thymohydroquinone  dimethyl ether, | 6427071 | 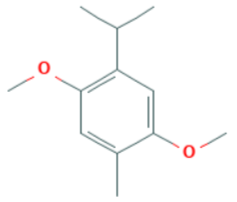 | (4lq3)  -5.1 |
| (4rpb)  -5.5 |
| Thymol  methyl ether | 14104 | 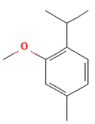 | (4lq3)  -5.2 |
| (4rpb)  -5.4 |
| Isothymol  methyl ether | 161716 | 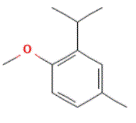 | (4lq3)  -5 |
| (4rpb)  -5.5 |
| Cuminaldehyde | 326 | 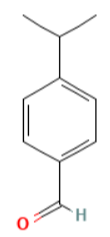 | (4lq3)  -5.4 |
| (4rpb)  -6.4 |
| Rasun | Allitridin | 16315 | 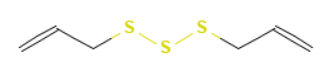 | (4lq3)  -3.3 |
| (4rpb)  -3.4 |
| Alliin | 9576089 | 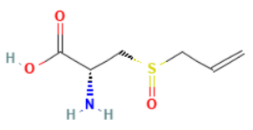 | (4lq3)  -4.5 |
| (4rpb)  -4.6 |
| Allicin, | 65036 | 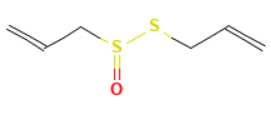 | (4lq3)  -3.7 |
| (4rpb)  -3.5 |
| Diallyl sulfide, | 11617 | 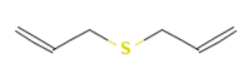 | (4lq3)  -3.2 |
| (4rpb)  -3.2 |
| Ajoene | 5386591 | 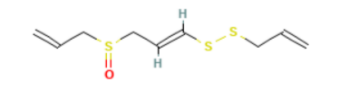 | (4lq3)  -4.1 |
| (4rpb)  -4 |
| Sal-parni | Pterocarpans, | 6451349 | 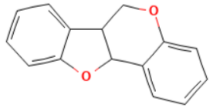 | (4lq3)  -7 |
| (4rpb)  -7.5 |
| Phenylpropanoids | 3314 | 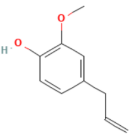 | (4lq3)  -5.3 |
| (4rpb)  -5.8 |
| Sarisa | Indole | 798 | 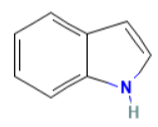 | (4lq3)  -5.2 |
| (4rpb)  -6.2 |
|  | Phenanthrene | 995 | 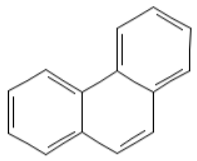 | (4lq3)  -6.6 |
| (4rpb)  -6.8 |
| Shimul | Bombamalones C | 23642717 | 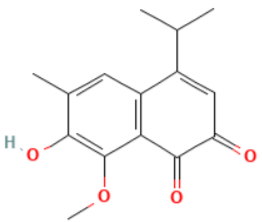 | (4lq3)  -6.4 |
| (4rpb)  -6.7 |
| Bombaxquinone B, | 328066 | 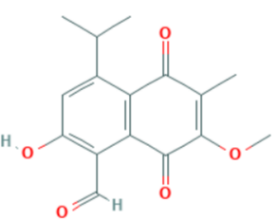 | (4lq3)  -6.7 |
| (4rpb)  -6.7 |
| Tulsi | B-elemene | 6918391 | 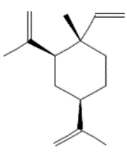 | (4lq3)  -7.7 |
| (4rpb)  -9.4 |
| Limonene, | 22311 | 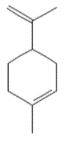 | (4lq3)  -5 |
| (4rpb)  -5.4 |
| Carvacrol | 10364 | 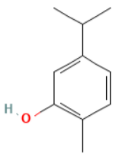 | (4lq3)  -5.3 |
| (4rpb)  -5.7 |
| Tut begun | Gallic acid | 370 | 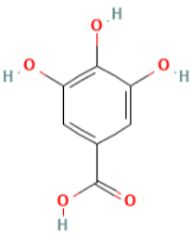 | (4lq3)  -6 |
| (4rpb)  -6.1 |

**Supplementary Table 2:** Drug likeness properties of 59 phytochemical compounds.

| **Compound ID** | **MW**  **(g/mol)** | **RO5** | **Log p** | **Log s** | **HBD** | **HBA** | **TPSA**  **(Å2)** | **Bioavailability score** |
| --- | --- | --- | --- | --- | --- | --- | --- | --- |
| CID 92776 | 204.35 g/mol | 1 | 5.63 | -5.41 | 0 | 0 | 0.00 Å² | 0.55 |
| CID 5317270 | 222.37 g/mol | 0 | 4.68 | -4.19 | 1 | 1 | 20.23 Å² | 0.55 |
| CID 442793 | 294.39 g/mol | 0 | 3.58 | -3.63 | 2 | 4 | 66.76 Å² | 0.55 |
| CID 5281794 | 276.37 g/mol | 0 | 3.6 | -4.47 | 1 | 3 | 46.53 Å² | 0.55 |
| CID 21601966 | 344.53 g/mol | 1 | 5.47 | -5.78 | 0 | 2 | 34.14 Å² | 0.55 |
| CID 53957771 | 342.51 g/mol | 1 | 5.14 | -6.65 | 0 | 2 | 26.30 Å² | 0.55 |
| CID 11349 | 238.24 g/mol | 0 | 3.03 | -3.23 | 1 | 3 | 50.44 Å² | 0.55 |
| CID 6780 | 208.21 g/mol | 0 | 3.6 | -4.18 | 0 | 2 | 34.14 Å² | 0.55 |
| CID 667496 | 188.23 g/mol | 0 | 1.05 | -1.59 | 1 | 3 | 35.83 Å² | 0.55 |
| CID 442894 | 172.23 g/mol | 0 | 1.85 | -1.89 | 0 | 2 | 15.60 Å² | 0.55 |
| CID 6251 | 182.17 g/mol | 1 | -3.32 | 1.13 | 6 | 6 | 121.38 Å² | 0.55 |
| CID 442935 | 202.21 g/mol | 0 | -0.14 | -0.9 | 1 | 4 | 55.12 Å² | 0.55 |
| CID 10212 | 270.28 g/mol | 0 | 3.22 | -4.52 | 0 | 4 | 52.58 Å² | 0.55 |
| CID 10666 | 164.16 g/mol | 0 | 0.48 | -0.8 | 0 | 4 | 55.02 Å² | 0.55 |
| CID 5280343 | 302.24 g/mol | 0 | 2.17 | -3 | 5 | 7 | 131.36 Å² | 0.55 |
| CID 5281708 | 254.24 g/mol | 0 | 2.68 | -3.08 | 2 | 4 | 70.67 Å² | 0.55 |
| CID 5281781 | 314.29 g/mol | 0 | 2.81 | -3.16 | 2 | 6 | 89.13 Å² | 0.55 |
| CID 5280443 | 270.24 g/mol | 0 | 3.11 | -3.19 | 3 | 5 | 90.90 Å² | 0.55 |
| CID 174174 | 289.37 g/mol | 0 | 1.71 | -2.43 | 1 | 4 | 49.77 Å² | 0.55 |
| CID 5316212 | 238.37 g/mol | 0 | 2.57 | -1.89 | 2 | 2 | 40.46 Å² | 0.55 |
| CID 7460 | 136.23 g/mol | 0 | 4.9 | -4.85 | 0 | 0 | 0.00 Å² | 0.55 |
| CID 11463 | 136.23 g/mol | 0 | 4.67 | -3.88 | 0 | 0 | 0.00 Å² | 0.55 |
| CID 1057 | 126.11 g/mol | 0 | 0.48 | -0.49 | 3 | 3 | 60.69 Å² | 0.55 |
| CID 7362 | 96.08 g/mol | 0 | 0.23 | 0.19 | 0 | 2 | 30.21 Å² | 0.55 |
| CID 5281614 | 86.24 g/mol | 0 | 2.55 | -2.85 | 4 | 6 | 111.13 Å² | 0.55 |
| CID 54678486 | 308.33 g/mol | 0 | 2.41 | -3.47 | 1 | 4 | 67.51 Å² | 0.55 |
| CID 4650 | 108.09 g/mol | 0 | 0.14 | | -0.67 |  | | --- | --- | | 0 | 2 | 34.14 Å² | 0.55 |
| CID 188308 | 288.25 g/mol | 0 | 2.33 | -2.88 | 4 | 6 | 107.22 Å² | 0.55 |
| CID 996 | 94.11 g/mol | 0 | 1.65 | -0.86 | 1 | 1 | 20.23 Å² | 0.55 |
| CID 6306 | 131.17 g/mol | 0 | -2.58 | 0.27 | 2 | 2 | 63.32 Å² | 0.55 |
| CID 1107 | 248.40 g/mol | 1 | 5.04 | -5.76 | 1 | 1 | 20.23 Å² | 0.55 |
| CID 5280863 | 286.24 g/mol | 0 | 2.64 | -3 | 4 | 6 | 111.13 Å² | 0.55 |
| CID 5280445 | 286.24 g/mol | 0 | 2.34 | -2.81 | 4 | 6 | 111.13 Å² | 0.55 |
| CID 638088 | 180.25 g/mol | 1 | 4.25 | -4.89 | 0 | 0 | 0.00 Å² | 0.55 |
| CID 689043 | 180.16 g/mol | 0 | 1.25 | -1.5 | 3 | 3 | 77.76 Å² | 0.56 |
| CID 638024 | 285.34 g/mol | 0 | 2.94 | -3.79 | 0 | 3 | 38.77 Å² | 0.55 |
| CID 2850046 | 252.27 g/mol | 0 | 2.69 | -4.13 | 1 | 4 | 59.28 Å² | 0.55 |
| CID 14018348 | 312.27 g/mol | 0 | 2.44 | -3.7 | 3 | 6 | 100.13 Å² | 0.55 |
| CID 70446911 | 250.29 g/mol | 0 | 3.76 | -5.02 | 0 | 2 | 30.21 Å² | 0.55 |
| CID 6427071 | 194.27 g/mol | 0 | 4.16 | -3.85 | 0 | 2 | 18.46 Å² | 0.55 |
| CID 14104 | 164.24 g/mol | 0 | 4.26 | -4 | 0 | 1 | 9.23 Å² | 0.55 |
| CID 161716 | 164.24 g/mol | 0 | 4.24 | -3.97 | 0 | 1 | 9.23 Å² | 0.55 |
| CID 326 | 148.20 g/mol | 0 | 2.9 | -2.63 | 0 | 1 | 17.07 Å² | 0.55 |
| CID 16315 | 178.34 g/mol | 0 | 3.91 | -4.1 | 0 | 3 | 75.90 Å² | 0.55 |
| CID 9576089 | 177.22 g/mol | 0 | -3.32 | 0.44 | 2 | 3 | 99.60 Å² | 0.55 |
| CID 65036 | 162.27 g/mol | 0 | 1.98 | -1.87 | 0 | 2 | 61.58 Å² | 0.55 |
| CID 11617 | 114.21 g/mol | 0 | 2.3 | -1.7 | 0 | 1 | 25.30 Å² | 0.55 |
| CID 5386591 | 234.40 g/mol | 0 | 2.44 | -2.66 | 0 | 3 | 86.88 Å² | 0.55 |
| CID 6451349 | 224.25 g/mol | 0 | 3.92 | -4 | 0 | 2 | 18.46 Å² | 0.55 |
| CID 5971 | 99.15 g/mol | 0 | - | - | - | - | 44.45 Å² | 0.55 |
| CID 3314 | 164.20 g/mol | 0 | 2.32 | -1.53 | 1 | 2 | 29.46 Å² | 0.55 |
| CID 798 | 117.15 g/mol | 0 | 2.16 | -1.79 | 1 | 0 | 15.79 Å² | 0.55 |
| CID 23642717 | 260.29 g/mol | 0 | 2.95 | -3.25 | 1 | 4 | 63.60 Å² | 0.55 |
| CID 328066 | 288.30 g/mol | 0 | 3.05 | -3.35 | 1 | 5 | 80.67 Å² | 0.56 |
| CID 6918391 | 204.35 g/mol | 1 | 5.78 | -5.41 | 0 | 0 | 0.00 Å² | o.55 |
| CID 22311 | 136.23 g/mol | 0 | 4.67 | -4.1 | 0 | 0 | 0.00 Å² | 0.55 |
| CID 10364 | 150.22 g/mol | 0 | 3.28 | -2.55 | 1 | 1 | 20.23 Å² | 0.55 |
| CID 370 | 170.12 g/mol | 0 | 0.52 | -1.67 | 4 | 4 | 97.99 Å² | 0.56 |

**Supplementary Table 3:** Toxicity properties of 59 phytochemical ligand molecules

| **Compound ID** | **HIA** | **BBB** | **Caco-2** | **p-glycoprotein substrate** | **p-glycoprotein inhibitor** | **Ames test** | **Carcinogenicity** |
| --- | --- | --- | --- | --- | --- | --- | --- |
| CID 92776 | + | + | + | substrate | Non-inhibitor | - | No |
| CID 5317270 | + | + | + | substrate | Non-inhibitor | - | No |
| CID 442793 | + | + | + | substrate | Non-inhibitor | - | No |
| CID 5281794 | + | + | + | substrate | Non-inhibitor | - | No |
| CID 21601966 | + | + | + | substrate | Non-inhibitor | - | No |
| CID 53957771 | + | + | + | Non-substate | inhibitor | - | No |
| CID 11349 | + | + | + | substrate | Non-inhibitor | + | No |
| CID 6780 | + | + | + | substrate | Non-inhibitor | + | Yes |
| CID 667496 | + | + | + | substrate | Non-inhibitor | + | Yes |
| CID 442894 | + | + | + | Non-substrate | Non-inhibitor | + | Yes |
| CID 6251 | - | - | - | substrate | Non-inhibitor | - | No |
| CID 442935 | + | + | + | substrate | Non-inhibitor | - | Yes |
| CID 10212 | + | + | + | substrate | inhibitor | + | Yes |
| CID 10666 | + | + | + | substrate | Non-inhibitor | - | No |
| CID 10666 | + | + | + | substrate | Non-inhibitor | - | No |
| CID 5280343 | + | - | - | substrate | Non-inhibitor |  | No |
| CID 5281708 | + | + | + | substrate | Non-inhibitor | + | Yes |
| CID 5281781 | + | + | + | substrate | inhibitor | + | Yes |
| CID 5280443 | + | + | - | substrate | Non-inhibitor | + | Yes |
| CID 174174 | + | + | + | Non-substrate | Non-inhibitor | - | No |
| CID 5316212 | + | + | + | substrate | Non-inhibitor | - | Yes |
| CID 7460 | + | + | + | substrate | Non-inhibitor | - | No |
| CID 11463 | + | + | + | substrate | Non-inhibitor | - | Yes |
| CID 1057 | + | + | - | substrate | Non-inhibitor | - | No |
| CID 7362 | + | + | + | substrate | Non-inhibitor | - | Yes |
| CID 5281614 | + | - | - | substrate | Non-inhibitor | + | No |
| CID 54678486 | + | + | + | substrate | Non-inhibitor | - | No |
| CID 4650 | + | + | + | substrate | Non-inhibitor | - | Yes |
| CID 188308 | + | - | - | substrate | Non-inhibitor | + | No |
| CID 996 | + | + | + | substrate | Non-inhibitor | - | Yes |
| CID 6306 | + | + | - | substrate | Non-inhibitor | - | No |
| CID 1107 | + | + | + | substrate | Non-inhibitor | - | No |
| CID 5280863 | + | - | - | substrate | Non-inhibitor | + | Yes |
| CID 5280445 | + | - | - | substrate | Non-inhibitor | + | No |
| CID 638088 | + | + | + | substrate | Non-inhibitory | - | No |
| CID 689043 | + | + | - | substrate | Non-inhibitory | - | No |
| CID 638024 | + | + | + | substrate | inhibitor | + | Yes |
| CID 2850046 | + | + | + | substrate | Non-inhibitor | + | Yes |
| CID 14018348 | + | - | - | substrate | inhibitor | + | Yes |
| CID 70446911 | + | + | + | substrate | inhibitor | + | Yes |
| CID 6427071 | + | + | + | substrate | Non-inhibitor | - | No |
| CID 14104 | + | + | + | substrate | Non-inhibitor | - | Yes |
| CID 161716 | + | + | + | substrate | Non-inhibitor | - | Yes |
| CID 16315 | + | + | + | substrate | Non-inhibitor | + | No |
| CID 9576089 | - | - | - | substrate | inhibitor | + | Yes |
| CID 65036 | + | + | + | substrate | Non-inhibitor | + | Yes |
| CID 11617 | + | + | + | substrate | Non-inhibitor | + | No |
| CID 5386591 | + | + | + | substrate | inhibitor | + | Yes |
| CID 6451349 | + | + | + | substrate | Non-inhibitor | - | No |
| CID 5971 |  |  |  |  |  |  | Yes |
| CID 3314 | + | + | + | substrate | Non-inhibitor | - | No |
| CID 798 | + | + | + | substrate | Non-inhibitory | - | No |
| CID 23642717 | + | + | + | substrate | Non-inhibitory | + | Yes |
| CID 328066 | + | + | - | substrate | Non-inhibitory | + | Yes |
| CID 6918391 | + | + | + | substrate | Non-inhibitor | - | Yes |
| CID 22311 | + | + | + | substrate | Non-inhibitor | - | No |
| CID 10364 | + | + | + | substrate | Non-inhibitor | - | No |
| CID 370 | + | - | - | substrate | Non-inhibitor | - | No |
| CID 326 | + | + | + | substrate | Non-inhibitor | - | No |
